# Supplementary material for: Characterization of winged helix domain fusion endonucleases as N6-methyladenine-dependent type IV restriction systems
Source: Front Microbiol. 2024 Apr 9;15:1286822. doi: 10.3389/fmicb.2024.1286822 (PMC11037411; doi:10.3389/fmicb.2024.1286822)
Supplement: Supplementary file 8 [file Table_8.XLSX]

## Sheet: Proteins
Accession	Description	Coverage [%]	# Peptides	# PSMs	# Unique Peptides	# AAs	MW [kDa]	calc. pI	Score Sequest HT: Sequest HT
HhiV4I	winged-helix restriction endonuclease +6His 387aa	95	52	1562	52	387	45	4.97	5522.58
A0A140NE25	Glutamine--fructose-6-phosphate aminotransferase [isomerizing] OS=Escherichia coli (strain B / BL21-DE3) OX=469008 GN=glmS PE=3 SV=1	82	45	202	45	609	66.9	5.87	807.39
A0A140N587	Bifunctional polymyxin resistance protein ArnA OS=Escherichia coli (strain B / BL21-DE3) OX=469008 GN=arnA PE=3 SV=1	84	46	210	46	660	74.2	6.87	803.49
A0A140NFV3	Chaperone protein DnaK OS=Escherichia coli (strain B / BL21-DE3) OX=469008 GN=dnaK PE=2 SV=1	82	51	142	51	638	69.1	4.97	572.54
A0A140N6V1	Peptidyl-prolyl cis-trans isomerase OS=Escherichia coli (strain B / BL21-DE3) OX=469008 GN=ECBD_0400 PE=3 SV=1	49	7	135	7	196	20.8	5.05	551.05
A0A140NE13	Ferric uptake regulation protein OS=Escherichia coli (strain B / BL21-DE3) OX=469008 GN=fur PE=3 SV=1	82	12	71	12	148	16.8	6.11	284.96
A0A140NE66	oxoglutarate dehydrogenase (succinyl-transferring) OS=Escherichia coli (strain B / BL21-DE3) OX=469008 GN=ECBD_2935 PE=3 SV=1	65	44	68	44	933	105	6.49	258.28
A0A140N4Y8	Protein RecA OS=Escherichia coli (strain B / BL21-DE3) OX=469008 GN=recA PE=3 SV=1	82	23	71	23	353	38	5.19	256.63
A0A140N8P7	Hydroxyethylthiazole kinase OS=Escherichia coli (strain B / BL21-DE3) OX=469008 GN=thiM PE=3 SV=1	49	8	54	8	262	27.3	5.99	219.43
A0A140NEV5	Alkyl hydroperoxide reductase subunit F OS=Escherichia coli (strain B / BL21-DE3) OX=469008 GN=ECBD_3046 PE=3 SV=1	65	29	62	29	531	57.4	5.69	215.13
A0A140N562	L-aspartate oxidase OS=Escherichia coli (strain B / BL21-DE3) OX=469008 GN=ECBD_1106 PE=3 SV=1	57	24	51	24	540	60.3	6.47	201.44
A0A140N3D6	Catabolite activator protein OS=Escherichia coli (strain B / BL21-DE3) OX=469008 GN=ECBD_0391 PE=4 SV=1	90	19	42	19	210	23.6	8.25	136.97
A0A140NFJ1	UDP-3-O-(3-hydroxymyristoyl)glucosamine N-acyltransferase OS=Escherichia coli (strain B / BL21-DE3) OX=469008 GN=lpxD PE=3 SV=1	62	12	35	12	341	36	6.77	135.55
A0A140NDC1	UPF0227 protein YcfP OS=Escherichia coli (strain B / BL21-DE3) OX=469008 GN=ycfP PE=3 SV=1	77	11	33	11	180	21.2	6.61	134.37
A0A140SS84	Acetylornithine deacetylase OS=Escherichia coli (strain B / BL21-DE3) OX=469008 GN=argE PE=3 SV=1	65	16	30	16	383	42.3	5.9	122.59
A0A140NA80	Succinate dehydrogenase flavoprotein subunit OS=Escherichia coli (strain B / BL21-DE3) OX=469008 GN=ECBD_2937 PE=3 SV=1	57	23	33	23	588	64.4	6.27	122.28
A0A140NCI6	Elongation factor Tu OS=Escherichia coli (strain B / BL21-DE3) OX=469008 GN=tuf PE=3 SV=1	55	18	36	18	394	43.3	5.45	115.29
A0A140N8D7	Phosphomethylpyrimidine kinase OS=Escherichia coli (strain B / BL21-DE3) OX=469008 GN=ECBD_1554 PE=4 SV=1	90	14	32	14	266	28.7	6.15	114.4
A0A140N7L1	Amidohydrolase OS=Escherichia coli (strain B / BL21-DE3) OX=469008 GN=ECBD_2279 PE=4 SV=1	69	19	31	19	436	46.6	5.86	113.42
A0A140NCS9	Ribose-phosphate pyrophosphokinase OS=Escherichia coli (strain B / BL21-DE3) OX=469008 GN=prs PE=3 SV=1	53	14	30	14	337	36.6	5.74	109.72
A0A140NHM8	Soluble pyridine nucleotide transhydrogenase OS=Escherichia coli (strain B / BL21-DE3) OX=469008 GN=sthA PE=3 SV=1	60	19	29	19	466	51.5	6.57	104.09
A0A140N6C1	DNA gyrase subunit B OS=Escherichia coli (strain B / BL21-DE3) OX=469008 GN=gyrB PE=3 SV=1	36	24	28	24	804	89.9	6.06	92.5
A0A140N7C7	Elongation factor G OS=Escherichia coli (strain B / BL21-DE3) OX=469008 GN=fusA PE=1 SV=1	40	19	25	19	704	77.5	5.38	88.82
A0A140NFZ9	Chaperone protein DnaJ OS=Escherichia coli (strain B / BL21-DE3) OX=469008 GN=dnaJ PE=3 SV=1	60	15	23	15	376	41	7.66	87.85
A0A140NEI9	Tol-Pal system protein TolB OS=Escherichia coli (strain B / BL21-DE3) OX=469008 GN=tolB PE=3 SV=1	46	15	21	15	430	45.9	7.59	78.9
A0A140NDW1	Pyruvate formate-lyase-activating enzyme OS=Escherichia coli (strain B / BL21-DE3) OX=469008 GN=ECBD_2693 PE=3 SV=1	54	11	22	11	246	28.2	6.46	77.41
A0A140N6N1	Glycerol-3-phosphate dehydrogenase OS=Escherichia coli (strain B / BL21-DE3) OX=469008 GN=ECBD_0316 PE=3 SV=1	46	22	24	22	501	56.7	7.44	76.79
A0A140N5P6	Putative transferase OS=Escherichia coli (strain B / BL21-DE3) OX=469008 GN=ECBD_0472 PE=4 SV=1	100	15	24	15	184	20.2	5.53	76.66
A0A140N6Z9	30S ribosomal protein S5 OS=Escherichia coli (strain B / BL21-DE3) OX=469008 GN=rpsE PE=1 SV=1	69	9	23	9	167	17.5	10.23	76.56
A0A140N5I1	GTP cyclohydrolase 1 OS=Escherichia coli (strain B / BL21-DE3) OX=469008 GN=folE PE=3 SV=1	57	12	22	12	222	24.8	7.33	75.34
A0A140N4M3	Nickel-responsive regulator OS=Escherichia coli (strain B / BL21-DE3) OX=469008 GN=nikR PE=3 SV=1	63	7	19	7	133	15.1	6.24	74.97
A0A140NAN1	Quinone-dependent D-lactate dehydrogenase OS=Escherichia coli (strain B / BL21-DE3) OX=469008 GN=dld PE=3 SV=1	46	22	23	22	571	64.6	6.67	73.67
A0A140N7A4	Alcohol dehydrogenase zinc-binding domain protein OS=Escherichia coli (strain B / BL21-DE3) OX=469008 GN=ECBD_2161 PE=3 SV=1	54	12	19	12	336	35.4	6.38	72.65
A0A140N8V9	Adenylyl-sulfate kinase OS=Escherichia coli (strain B / BL21-DE3) OX=469008 GN=cysC PE=3 SV=1	58	8	19	8	201	22.3	6.37	71.84
A0A140N9V4	Probable malate:quinone oxidoreductase OS=Escherichia coli (strain B / BL21-DE3) OX=469008 GN=mqo PE=3 SV=1	50	19	21	19	548	60.2	7.27	71.64
A0A140NDE3	Outer membrane protein A OS=Escherichia coli (strain B / BL21-DE3) OX=469008 GN=ompA PE=3 SV=1	50	13	18	13	346	37.2	6.42	67.75
A0A140NBT9	Cell division protein FtsA OS=Escherichia coli (strain B / BL21-DE3) OX=469008 GN=ftsA PE=3 SV=1	47	14	18	14	420	45.3	6.24	67.46
A0A140N7T0	Luciferase-like monooxygenase OS=Escherichia coli (strain B / BL21-DE3) OX=469008 GN=ECBD_0580 PE=4 SV=1	53	12	19	12	335	37.2	6.6	65.59
A0A140NFT4	Carbamoyl-phosphate synthase small chain OS=Escherichia coli (strain B / BL21-DE3) OX=469008 GN=carA PE=3 SV=1	61	15	18	15	382	41.4	6.38	64.55
A0A140N582	Cell shape-determining protein MreB OS=Escherichia coli (strain B / BL21-DE3) OX=469008 GN=mreB PE=3 SV=1	50	15	18	15	347	36.9	5.26	63.76
A0A140ND39	Acetolactate synthase OS=Escherichia coli (strain B / BL21-DE3) OX=469008 GN=ECBD_3539 PE=3 SV=1	41	17	19	17	574	63	6.33	62.8
A0A140N689	NAD kinase OS=Escherichia coli (strain B / BL21-DE3) OX=469008 GN=nadK PE=3 SV=1	46	10	17	10	292	32.5	6.79	62.28
A0A140N7E7	Bifunctional chorismate mutase/prephenate dehydratase OS=Escherichia coli (strain B / BL21-DE3) OX=469008 GN=ECBD_1087 PE=4 SV=1	44	16	20	16	386	43.1	6.68	61.97
A0A140N8W2	Diguanylate phosphodiesterase OS=Escherichia coli (strain B / BL21-DE3) OX=469008 GN=ECBD_2459 PE=4 SV=1	47	17	19	17	403	45.2	5.12	58.06
A0A140N8K1	Transcriptional regulator, LysR family OS=Escherichia coli (strain B / BL21-DE3) OX=469008 GN=ECBD_1501 PE=3 SV=1	58	11	16	11	293	32.7	6.54	58.01
A0A140NDY4	Guanosine-5'-triphosphate,3'-diphosphate pyrophosphatase OS=Escherichia coli (strain B / BL21-DE3) OX=469008 GN=gppA PE=3 SV=1	31	14	17	14	494	54.9	6.48	57.47
A0A140NAY3	Histidine biosynthesis bifunctional protein HisB OS=Escherichia coli (strain B / BL21-DE3) OX=469008 GN=hisB PE=3 SV=1	53	15	18	15	355	40.2	6.18	56.85
A0A140N4Z4	Transcriptional regulator, DeoR family OS=Escherichia coli (strain B / BL21-DE3) OX=469008 GN=ECBD_0319 PE=4 SV=1	59	10	16	10	252	28	6.27	56.55
A0A140NBR3	Carbonic anhydrase OS=Escherichia coli (strain B / BL21-DE3) OX=469008 GN=ECBD_3493 PE=3 SV=1	56	11	17	11	220	25.1	6.65	56.44
A0A140N855	Tyrosine recombinase XerD OS=Escherichia coli (strain B / BL21-DE3) OX=469008 GN=xerD PE=3 SV=1	45	12	16	12	298	34.2	8.81	55.9
A0A140NHC7	50S ribosomal subunit assembly factor BipA OS=Escherichia coli (strain B / BL21-DE3) OX=469008 GN=bipA PE=3 SV=1	37	15	15	15	607	67.3	5.33	54.05
A0A140NEE1	tRNA (cytidine/uridine-2'-O-)-methyltransferase TrmJ OS=Escherichia coli (strain B / BL21-DE3) OX=469008 GN=trmJ PE=3 SV=1	55	11	16	11	228	25.3	5.95	53.25
A0A140ND70	Efflux transporter, RND family, MFP subunit OS=Escherichia coli (strain B / BL21-DE3) OX=469008 GN=ECBD_3193 PE=3 SV=1	48	14	16	14	397	42.2	7.99	51.49
A0A140NB62	rRNA (Guanine-N(1)-)-methyltransferase OS=Escherichia coli (strain B / BL21-DE3) OX=469008 GN=ECBD_1819 PE=4 SV=1	44	12	16	12	269	30.4	7.5	50.42
A0A140NCJ4	D-amino acid dehydrogenase OS=Escherichia coli (strain B / BL21-DE3) OX=469008 GN=dadA PE=3 SV=1	46	14	16	14	432	47.6	6.62	50.27
A0A140NBS3	Dihydrolipoyl dehydrogenase OS=Escherichia coli (strain B / BL21-DE3) OX=469008 GN=ECBD_3503 PE=3 SV=1	42	15	16	15	474	50.7	6.15	49.91
A0A140NF01	Transcription termination factor Rho OS=Escherichia coli (strain B / BL21-DE3) OX=469008 GN=rho PE=3 SV=1	38	13	16	13	419	47	7.25	49.23
A0A140N4Y7	ATP-dependent RNA helicase DeaD OS=Escherichia coli (strain B / BL21-DE3) OX=469008 GN=deaD PE=3 SV=1	30	14	16	14	629	70.5	8.72	49.13
A0A140NBC0	DNA repair protein RadA OS=Escherichia coli (strain B / BL21-DE3) OX=469008 GN=radA PE=3 SV=1	43	14	15	14	460	49.4	7.24	48.94
A0A140N9P3	NADH-quinone oxidoreductase OS=Escherichia coli (strain B / BL21-DE3) OX=469008 GN=ECBD_1378 PE=3 SV=1	22	16	17	16	908	100.2	6.32	47.55
A0A140N982	Bifunctional protein PutA OS=Escherichia coli (strain B / BL21-DE3) OX=469008 GN=ECBD_2580 PE=3 SV=1	16	16	16	16	1320	143.7	5.78	47.33
A0A140N9F9	tRNA (guanine-N(1)-)-methyltransferase OS=Escherichia coli (strain B / BL21-DE3) OX=469008 GN=trmD PE=3 SV=1	33	6	12	6	255	28.4	5.78	47.27
A0A140NBU9	N-hydroxyarylamine O-acetyltransferase OS=Escherichia coli (strain B / BL21-DE3) OX=469008 GN=ECBD_2175 PE=3 SV=1	59	10	12	10	281	32.3	6.25	46.49
A0A140NFD2	Lipoprotein OS=Escherichia coli (strain B / BL21-DE3) OX=469008 GN=ECBD_3421 PE=3 SV=1	39	7	11	7	271	29.4	5.29	46.15
A0A140N3F8	3,4-dihydroxy-2-butanone 4-phosphate synthase OS=Escherichia coli (strain B / BL21-DE3) OX=469008 GN=ribB PE=3 SV=1	59	9	14	9	217	23.3	5.01	45.25
A0A140NC96	Transcriptional regulator, LysR family OS=Escherichia coli (strain B / BL21-DE3) OX=469008 GN=ECBD_2116 PE=3 SV=1	62	12	13	12	293	32.5	6.8	44.79
A0A140N4V4	Cell division ATP-binding protein FtsE OS=Escherichia coli (strain B / BL21-DE3) OX=469008 GN=ftsE PE=3 SV=1	67	9	11	9	222	24.4	9.33	44.63
A0A140N5A3	50S ribosomal protein L5 OS=Escherichia coli (strain B / BL21-DE3) OX=469008 GN=rplE PE=1 SV=1	60	10	14	10	179	20.3	9.48	44.43
A0A140N4K1	30S ribosomal protein S3 OS=Escherichia coli (strain B / BL21-DE3) OX=469008 GN=rpsC PE=1 SV=1	52	9	13	9	233	26	10.27	44.41
A0A140N5F4	Polyribonucleotide nucleotidyltransferase OS=Escherichia coli (strain B / BL21-DE3) OX=469008 GN=pnp PE=3 SV=1	19	11	14	11	711	77.1	5.21	44.16
A0A140NBN8	serine-type D-Ala-D-Ala carboxypeptidase OS=Escherichia coli (strain B / BL21-DE3) OX=469008 GN=ECBD_3019 PE=3 SV=1	40	12	14	12	403	44.4	8.28	43.97
A0A140N5L9	Cysteine synthase OS=Escherichia coli (strain B / BL21-DE3) OX=469008 GN=ECBD_1267 PE=3 SV=1	50	11	13	11	323	34.5	6.06	43.89
A0A140NBB3	Pyruvate kinase OS=Escherichia coli (strain B / BL21-DE3) OX=469008 GN=ECBD_1784 PE=3 SV=1	38	14	14	14	480	51.3	6.68	43.34
A0A140NDK1	Membrane-bound PQQ-dependent dehydrogenase, glucose/quinate/shikimate family OS=Escherichia coli (strain B / BL21-DE3) OX=469008 GN=ECBD_3495 PE=3 SV=1	23	12	13	12	796	86.7	5.62	43.31
A0A140SS78	NAD-capped RNA hydrolase NudC OS=Escherichia coli (strain B / BL21-DE3) OX=469008 GN=nudC PE=3 SV=1	46	9	13	9	257	29.7	5.78	42.91
A0A140NH27	DNA-directed RNA polymerase subunit beta' OS=Escherichia coli (strain B / BL21-DE3) OX=469008 GN=rpoC PE=3 SV=1	14	15	15	15	1407	155.1	7.08	41.84
A0A140N812	Transcriptional regulator, PadR-like family OS=Escherichia coli (strain B / BL21-DE3) OX=469008 GN=ECBD_0671 PE=4 SV=1	35	7	12	7	207	23.4	6.74	41.77
A0A140NFK0	Methionine synthase OS=Escherichia coli (strain B / BL21-DE3) OX=469008 GN=ECBD_4018 PE=3 SV=1	15	14	14	14	1227	135.9	5.07	41.51
A0A140N704	High-affinity zinc uptake system protein ZnuA OS=Escherichia coli (strain B / BL21-DE3) OX=469008 GN=ECBD_1781 PE=3 SV=1	45	9	12	9	315	34.3	6.11	40.01
A0A140N5H6	Biosynthetic arginine decarboxylase OS=Escherichia coli (strain B / BL21-DE3) OX=469008 GN=speA PE=3 SV=1	28	11	12	11	658	73.9	4.94	39.49
A0A140N7Z4	Cobalamin synthesis protein P47K OS=Escherichia coli (strain B / BL21-DE3) OX=469008 GN=ECBD_1484 PE=4 SV=1	38	10	12	10	328	36.1	6.47	38.47
A0A140N7G6	DUF218 domain-containing protein OS=Escherichia coli (strain B / BL21-DE3) OX=469008 GN=ECBD_2226 PE=4 SV=1	52	9	11	9	266	29.6	5.87	38.31
A0A140NDN8	Catabolite repressor/activator OS=Escherichia coli (strain B / BL21-DE3) OX=469008 GN=ECBD_3537 PE=4 SV=1	39	8	11	8	334	38	6.96	37.6
A0A140N9D7	Transcriptional regulator, LysR family OS=Escherichia coli (strain B / BL21-DE3) OX=469008 GN=ECBD_2217 PE=3 SV=1	46	9	10	9	307	33.4	7.97	37.55
A0A140NHS0	ATP synthase subunit beta OS=Escherichia coli (strain B / BL21-DE3) OX=469008 GN=atpD PE=3 SV=1	25	8	11	8	460	50.3	5.01	37.02
A0A140NBM4	Bifunctional uridylyltransferase/uridylyl-removing enzyme OS=Escherichia coli (strain B / BL21-DE3) OX=469008 GN=glnD PE=3 SV=1	15	11	11	11	890	102.3	6.73	36.29
A0A140N9B6	Succinylornithine transaminase OS=Escherichia coli (strain B / BL21-DE3) OX=469008 GN=astC PE=3 SV=1	36	8	10	8	406	43.6	6.35	35.84
A0A140NBF7	Catalase OS=Escherichia coli (strain B / BL21-DE3) OX=469008 GN=ECBD_1913 PE=3 SV=1	20	13	13	13	753	84.1	5.82	35.68
A0A140N4C7	guanosine-3',5'-bis(diphosphate) 3'-diphosphatase OS=Escherichia coli (strain B / BL21-DE3) OX=469008 GN=ECBD_0075 PE=3 SV=1	22	10	11	10	702	79.3	8.73	35.48
A0A140NFM6	Cell division protein FtsZ OS=Escherichia coli (strain B / BL21-DE3) OX=469008 GN=ftsZ PE=3 SV=1	35	10	11	10	383	40.3	4.78	35.33
A0A140NC71	Glycosyl transferase, family 3-like protein OS=Escherichia coli (strain B / BL21-DE3) OX=469008 GN=ECBD_2823 PE=4 SV=1	33	8	9	8	320	35	6.86	34.51
A0A140NF86	ATP-dependent protease ATPase subunit HslU OS=Escherichia coli (strain B / BL21-DE3) OX=469008 GN=hslU PE=2 SV=1	27	11	12	11	443	49.6	5.35	34.42
A0A140NBG5	ATP-dependent Clp protease, ATP-binding subunit clpA OS=Escherichia coli (strain B / BL21-DE3) OX=469008 GN=ECBD_2712 PE=3 SV=1	21	12	12	12	758	84.2	6.32	34.07
A0A140N3H4	50S ribosomal protein L14 OS=Escherichia coli (strain B / BL21-DE3) OX=469008 GN=rplN PE=1 SV=1	58	7	12	7	123	13.5	10.42	33.59
A0A140NE87	Single-stranded DNA-binding protein OS=Escherichia coli (strain B / BL21-DE3) OX=469008 GN=ECBD_3973 PE=3 SV=1	37	7	12	7	178	19	5.58	33.15
A0A140N626	DNA gyrase subunit A OS=Escherichia coli (strain B / BL21-DE3) OX=469008 GN=gyrA PE=3 SV=1	14	11	11	11	875	96.9	5.2	33.08
A0A140N598	50S ribosomal protein L13 OS=Escherichia coli (strain B / BL21-DE3) OX=469008 GN=rplM PE=1 SV=1	65	8	10	8	142	16	9.91	32.79
A0A140NAQ9	Carboxy-S-adenosyl-L-methionine synthase OS=Escherichia coli (strain B / BL21-DE3) OX=469008 GN=cmoA PE=3 SV=1	32	7	10	7	247	27.8	5.77	32.64
A0A140N683	RNA polymerase sigma factor RpoD OS=Escherichia coli (strain B / BL21-DE3) OX=469008 GN=rpoD PE=3 SV=1	14	8	10	8	613	70.2	4.81	31.55
A0A140N9U3	FAD linked oxidase domain protein OS=Escherichia coli (strain B / BL21-DE3) OX=469008 GN=ECBD_1959 PE=4 SV=1	13	11	11	11	1018	113.2	7.11	31.51
A0A140NBE7	Formate acetyltransferase OS=Escherichia coli (strain B / BL21-DE3) OX=469008 GN=ECBD_2692 PE=3 SV=1	17	10	10	10	760	85.3	6.01	31.26
A0A140N788	Glutamate synthase, small subunit OS=Escherichia coli (strain B / BL21-DE3) OX=469008 GN=ECBD_0529 PE=4 SV=1	28	9	11	8	472	52	5.71	30.76
A0A140NAB9	Acetyltransferase OS=Escherichia coli (strain B / BL21-DE3) OX=469008 GN=ECBD_1620 PE=4 SV=1	58	7	9	7	192	20.6	5.08	30.65
A0A140ND08	Adenylate cyclase OS=Escherichia coli (strain B / BL21-DE3) OX=469008 GN=ECBD_4236 PE=3 SV=1	14	9	9	9	848	97.7	6.15	30.42
A0A140NDR7	UDP-N-acetylmuramate--L-alanyl-gamma-D-glutamyl-meso-2,6-diaminoheptandioate ligase OS=Escherichia coli (strain B / BL21-DE3) OX=469008 GN=mpl PE=3 SV=1	26	7	9	7	457	49.8	5.91	29.29
A0A140N6Y5	30S ribosomal protein S10 OS=Escherichia coli (strain B / BL21-DE3) OX=469008 GN=rpsJ PE=1 SV=1	50	6	9	6	103	11.7	9.69	28.58
A0A140NE27	Acetyltransferase component of pyruvate dehydrogenase complex OS=Escherichia coli (strain B / BL21-DE3) OX=469008 GN=ECBD_3504 PE=3 SV=1	19	9	9	9	630	66.1	5.17	28.25
A0A140SSB4	Thioesterase superfamily protein OS=Escherichia coli (strain B / BL21-DE3) OX=469008 GN=ECBD_4218 PE=4 SV=1	54	8	10	8	155	17.2	6.95	28.1
A0A140N9X7	Peptidase U32 OS=Escherichia coli (strain B / BL21-DE3) OX=469008 GN=ECBD_2204 PE=4 SV=1	18	9	10	9	653	72.7	7.17	27.65
A0A140SS80	DNA-directed RNA polymerase subunit beta OS=Escherichia coli (strain B / BL21-DE3) OX=469008 GN=rpoB PE=1 SV=1	9	11	11	11	1342	150.5	5.26	27.46
A0A140NDY0	Cyclic pyranopterin monophosphate synthase OS=Escherichia coli (strain B / BL21-DE3) OX=469008 GN=moaC PE=3 SV=1	48	6	7	6	161	17.5	7.11	27.12
A0A140NC11	Peptidoglycan-associated lipoprotein OS=Escherichia coli (strain B / BL21-DE3) OX=469008 GN=pal PE=3 SV=1	51	6	7	6	173	18.8	6.8	27.12
A0A140NE43	tRNA-2-methylthio-N(6)-dimethylallyladenosine synthase OS=Escherichia coli (strain B / BL21-DE3) OX=469008 GN=miaB PE=3 SV=1	25	10	10	10	474	53.6	5.34	26.72
A0A140NA87	Diguanylate cyclase OS=Escherichia coli (strain B / BL21-DE3) OX=469008 GN=ECBD_2104 PE=4 SV=1	28	6	7	6	296	33.9	5.95	26.54
A0A140ND61	Chaperone protein HtpG OS=Escherichia coli (strain B / BL21-DE3) OX=469008 GN=htpG PE=3 SV=1	19	8	8	8	624	71.4	5.21	25.33
A0A140N4K8	Nitrogen regulatory protein P-II OS=Escherichia coli (strain B / BL21-DE3) OX=469008 GN=ECBD_1131 PE=3 SV=1	55	7	8	7	112	12.4	5.34	24.71
A0A140N899	Glucose-6-phosphate 1-dehydrogenase OS=Escherichia coli (strain B / BL21-DE3) OX=469008 GN=zwf PE=3 SV=1	18	9	9	9	491	55.7	5.76	24.67
A0A140N3T4	Translation initiation factor IF-2 OS=Escherichia coli (strain B / BL21-DE3) OX=469008 GN=infB PE=3 SV=1	15	9	9	9	890	97.3	6.07	24.65
A0A140N9J4	Diamine N-acetyltransferase OS=Escherichia coli (strain B / BL21-DE3) OX=469008 GN=ECBD_2062 PE=4 SV=1	34	5	7	5	186	21.9	6.68	24.47
A0A140NAF9	Lipoyl synthase OS=Escherichia coli (strain B / BL21-DE3) OX=469008 GN=lipA PE=3 SV=1	27	7	7	7	321	36	7.94	24.36
A0A140NCS6	Ubiquinol oxidase subunit 2 OS=Escherichia coli (strain B / BL21-DE3) OX=469008 GN=ECBD_3226 PE=3 SV=1	33	6	7	6	315	34.9	7.02	24.13
A0A140N583	Bifunctional protein HldE OS=Escherichia coli (strain B / BL21-DE3) OX=469008 GN=hldE PE=3 SV=1	24	8	8	8	477	51	5.41	23.96
A0A140N6X3	Aminotransferase class I and II OS=Escherichia coli (strain B / BL21-DE3) OX=469008 GN=ECBD_1293 PE=4 SV=1	21	7	7	7	412	46.2	7.87	23.46
A0A140NEL5	Triosephosphate isomerase OS=Escherichia coli (strain B / BL21-DE3) OX=469008 GN=tpiA PE=3 SV=1	46	7	7	7	255	27	5.96	23.46
A0A140NEF7	Phosphopentomutase OS=Escherichia coli (strain B / BL21-DE3) OX=469008 GN=deoB PE=3 SV=1	26	8	8	8	407	44.3	5.35	23.37
A0A140N745	NADH-quinone oxidoreductase subunit C/D OS=Escherichia coli (strain B / BL21-DE3) OX=469008 GN=nuoC PE=3 SV=1	14	7	7	7	600	68.7	6.42	23.25
A0A140NBA5	30S ribosomal protein S1 OS=Escherichia coli (strain B / BL21-DE3) OX=469008 GN=ECBD_2684 PE=3 SV=1	16	8	8	8	557	61.1	4.98	23.18
A0A140N536	Signal recognition particle protein OS=Escherichia coli (strain B / BL21-DE3) OX=469008 GN=ffh PE=3 SV=1	25	8	9	8	453	49.8	9.51	23.01
A0A140NAU1	NAD-dependent epimerase/dehydratase OS=Escherichia coli (strain B / BL21-DE3) OX=469008 GN=ECBD_2726 PE=4 SV=1	30	8	8	8	349	39.6	8.63	22.61
A0A140NAB3	Diguanylate cyclase with PAS/PAC sensor OS=Escherichia coli (strain B / BL21-DE3) OX=469008 GN=ECBD_2276 PE=4 SV=1	22	7	7	7	410	46.4	6.8	22.55
A0A140N7E6	Threonine--tRNA ligase OS=Escherichia coli (strain B / BL21-DE3) OX=469008 GN=thrS PE=3 SV=1	12	7	8	7	642	74	6.19	22.48
A0A140NDX4	Dihydrolipoyllysine-residue succinyltransferase component of 2-oxoglutarate dehydrogenase complex OS=Escherichia coli (strain B / BL21-DE3) OX=469008 GN=ECBD_2934 PE=3 SV=1	20	6	7	6	405	44	5.81	22.43
A0A140NB40	Acetolactate synthase small subunit OS=Escherichia coli (strain B / BL21-DE3) OX=469008 GN=ECBD_3538 PE=3 SV=1	56	7	7	7	163	18	8.43	22.39
A0A140N5P0	Ribosomal RNA small subunit methyltransferase I OS=Escherichia coli (strain B / BL21-DE3) OX=469008 GN=rsmI PE=3 SV=1	31	7	8	7	286	31.3	6.24	22.12
A0A140NBD3	Phospho-2-dehydro-3-deoxyheptonate aldolase OS=Escherichia coli (strain B / BL21-DE3) OX=469008 GN=ECBD_2913 PE=3 SV=1	26	6	6	6	350	38	6.6	22.09
A0A140SS73	Glycerol kinase OS=Escherichia coli (strain B / BL21-DE3) OX=469008 GN=glpK PE=3 SV=1	17	7	7	7	502	56.2	5.5	22.04
A0A140NCN5	DNA polymerase III subunit gamma/tau OS=Escherichia coli (strain B / BL21-DE3) OX=469008 GN=dnaX PE=3 SV=1	13	7	7	7	643	71.1	6.84	21.54
A0A140N737	UPF0304 protein YfbU OS=Escherichia coli (strain B / BL21-DE3) OX=469008 GN=yfbU PE=3 SV=1	52	7	8	7	164	19.5	6.52	20.95
A0A140NFG9	3-octaprenyl-4-hydroxybenzoate carboxy-lyase OS=Escherichia coli (strain B / BL21-DE3) OX=469008 GN=ubiD PE=3 SV=1	17	7	7	7	497	55.6	5.52	20.8
A0A140N7A3	Lipopolysaccharide export system ATP-binding protein LptB OS=Escherichia coli (strain B / BL21-DE3) OX=469008 GN=ECBD_0541 PE=3 SV=1	41	6	6	6	241	26.8	5.99	20.69
A0A140N5N9	Trk system potassium uptake protein TrkA OS=Escherichia coli (strain B / BL21-DE3) OX=469008 GN=ECBD_0462 PE=4 SV=1	12	4	6	4	458	50.3	5.95	20.69
A0A140NB77	Phosphoenolpyruvate synthase OS=Escherichia coli (strain B / BL21-DE3) OX=469008 GN=ECBD_1944 PE=3 SV=1	11	7	7	7	792	87.3	5.03	20.6
A0A140N8R5	AMP nucleosidase OS=Escherichia coli (strain B / BL21-DE3) OX=469008 GN=ECBD_0934 PE=4 SV=1	19	7	7	7	454	50.9	6.48	20.3
A0A140N7Y4	Pseudouridine synthase OS=Escherichia coli (strain B / BL21-DE3) OX=469008 GN=ECBD_1474 PE=3 SV=1	29	5	6	5	231	25.8	6.18	20.26
A0A140NH65	Chaperonin GroEL OS=Escherichia coli (strain B / BL21-DE3) OX=469008 GN=groEL PE=3 SV=1	16	8	8	8	548	57.3	4.94	20
A0A140NFM7	50S ribosomal protein L1 OS=Escherichia coli (strain B / BL21-DE3) OX=469008 GN=rplA PE=3 SV=1	33	6	7	6	234	24.7	9.64	19.96
A0A140N731	Cytoskeleton protein RodZ OS=Escherichia coli (strain B / BL21-DE3) OX=469008 GN=rodZ PE=3 SV=1	23	5	5	5	337	36.2	5.74	19.82
A0A140NBF4	Succinate--CoA ligase [ADP-forming] subunit beta OS=Escherichia coli (strain B / BL21-DE3) OX=469008 GN=sucC PE=3 SV=1	16	5	6	5	388	41.4	5.52	19.49
A0A140NBY0	Pectinesterase OS=Escherichia coli (strain B / BL21-DE3) OX=469008 GN=ECBD_2910 PE=4 SV=1	17	4	8	4	427	46.1	6	19.27
A0A140N9S6	Diguanylate cyclase/phosphodiesterase with PAS/PAC sensor(S) OS=Escherichia coli (strain B / BL21-DE3) OX=469008 GN=ECBD_2150 PE=4 SV=1	10	7	7	7	799	90.2	5.49	19.08
A0A140NBL4	Outer membrane protein assembly factor BamA OS=Escherichia coli (strain B / BL21-DE3) OX=469008 GN=bamA PE=3 SV=1	13	7	7	7	810	90.5	5.12	19.02
A0A140N5C4	DUF2623 domain-containing protein OS=Escherichia coli (strain B / BL21-DE3) OX=469008 GN=ECBD_0739 PE=4 SV=1	55	5	7	5	95	11	9.13	18.97
A0A140NDQ6	3-ketoacyl-CoA thiolase OS=Escherichia coli (strain B / BL21-DE3) OX=469008 GN=fadA PE=3 SV=1	21	5	5	5	387	40.8	6.84	18.86
A0A140N8V5	Phospholipase D/Transphosphatidylase OS=Escherichia coli (strain B / BL21-DE3) OX=469008 GN=ECBD_1095 PE=3 SV=1	16	5	6	5	451	52.8	8.98	18.81
A0A140NGK1	RNA-binding protein Hfq OS=Escherichia coli (strain B / BL21-DE3) OX=469008 GN=hfq PE=3 SV=1	68	4	5	4	102	11.2	7.65	18.55
A0A140N7J2	Major outer membrane lipoprotein Lpp OS=Escherichia coli (strain B / BL21-DE3) OX=469008 GN=lpp PE=3 SV=1	58	4	6	4	78	8.3	9.25	18.28
A0A140N877	hydrogenase (acceptor) OS=Escherichia coli (strain B / BL21-DE3) OX=469008 GN=ECBD_0741 PE=3 SV=1	15	4	5	4	372	39.6	6.76	18.13
A0A140ND72	ATP synthase subunit alpha OS=Escherichia coli (strain B / BL21-DE3) OX=469008 GN=atpA PE=3 SV=1	15	7	7	6	513	55.2	6.13	17.96
A0A140N9K4	NADH-quinone oxidoreductase subunit E OS=Escherichia coli (strain B / BL21-DE3) OX=469008 GN=ECBD_1376 PE=3 SV=1	33	5	5	5	166	18.6	5.68	17.6
A0A140N8Q5	Putative PTS IIA-like nitrogen-regulatory protein PtsN OS=Escherichia coli (strain B / BL21-DE3) OX=469008 GN=ECBD_1563 PE=4 SV=1	35	5	6	5	150	17	5.49	17.58
A0A140NGV4	UvrABC system protein A OS=Escherichia coli (strain B / BL21-DE3) OX=469008 GN=uvrA PE=3 SV=1	7	5	5	5	940	103.8	6.64	17.52
A0A140NAA1	Ribonuclease E OS=Escherichia coli (strain B / BL21-DE3) OX=469008 GN=rne PE=3 SV=1	8	7	7	7	1061	118.2	5.62	17.33
A0A140NAA0	GDP-mannose 4,6-dehydratase OS=Escherichia coli (strain B / BL21-DE3) OX=469008 GN=gmd PE=3 SV=1	14	4	5	4	373	42	6.16	17.07
A0A140N2U0	DNA-directed RNA polymerase subunit alpha OS=Escherichia coli (strain B / BL21-DE3) OX=469008 GN=rpoA PE=3 SV=1	23	6	6	6	329	36.5	5.06	16.84
A0A140NHG8	ABC transporter related OS=Escherichia coli (strain B / BL21-DE3) OX=469008 GN=ECBD_4000 PE=4 SV=1	21	6	6	6	371	41	6.7	16.82
A0A140N6R8	Cell division protein DamX OS=Escherichia coli (strain B / BL21-DE3) OX=469008 GN=damX PE=3 SV=1	18	6	6	6	428	46	5.81	16.68
A0A140N7N3	Glutamate synthase (Ferredoxin) OS=Escherichia coli (strain B / BL21-DE3) OX=469008 GN=ECBD_0530 PE=3 SV=1	5	6	6	6	1517	166.6	6.71	16.49
A0A140N7B0	Acetylornithine/succinyldiaminopimelate aminotransferase OS=Escherichia coli (strain B / BL21-DE3) OX=469008 GN=argD PE=3 SV=1	20	6	6	6	406	43.7	6.23	16.43
A0A140N6M3	Gluconokinase OS=Escherichia coli (strain B / BL21-DE3) OX=469008 GN=ECBD_0306 PE=3 SV=1	45	4	5	4	162	18	6.7	16.36
A0A140SS61	Regulator of sigma D OS=Escherichia coli (strain B / BL21-DE3) OX=469008 GN=rsd PE=3 SV=1	32	5	5	5	158	18.2	6.02	16.32
A0A140SS63	50S ribosomal protein L7/L12 OS=Escherichia coli (strain B / BL21-DE3) OX=469008 GN=rplL PE=3 SV=1	53	5	7	5	121	12.3	4.65	16.22
A0A140N548	30S ribosomal protein S4 OS=Escherichia coli (strain B / BL21-DE3) OX=469008 GN=rpsD PE=1 SV=1	28	6	6	6	206	23.5	10.05	16.21
A0A140NAC7	UDP-glucose 6-dehydrogenase OS=Escherichia coli (strain B / BL21-DE3) OX=469008 GN=ECBD_1631 PE=3 SV=1	18	6	6	6	388	43.6	6.46	15.67
A0A140NC10	Citrate synthase OS=Escherichia coli (strain B / BL21-DE3) OX=469008 GN=ECBD_2941 PE=3 SV=1	12	4	5	4	427	48	6.68	15.64
A0A140N9Z5	Cell division protein ZipA OS=Escherichia coli (strain B / BL21-DE3) OX=469008 GN=zipA PE=3 SV=1	21	3	3	3	328	36.5	6.01	15.44
A0A140NEP7	Glucosamine-6-phosphate deaminase OS=Escherichia coli (strain B / BL21-DE3) OX=469008 GN=nagB PE=3 SV=1	24	5	5	5	266	29.8	6.9	15.38
A0A140N9P2	Endolytic peptidoglycan transglycosylase RlpA OS=Escherichia coli (strain B / BL21-DE3) OX=469008 GN=rlpA PE=3 SV=1	25	6	6	6	362	37.5	5.73	15.37
A0A140N7J1	50S ribosomal protein L2 OS=Escherichia coli (strain B / BL21-DE3) OX=469008 GN=rplB PE=1 SV=1	26	4	4	4	273	29.8	10.93	15.29
A0A140NAV2	Putative GAF sensor protein OS=Escherichia coli (strain B / BL21-DE3) OX=469008 GN=ECBD_1808 PE=4 SV=1	34	5	5	5	183	20.3	4.86	15.14
A0A140N8X3	GTPase Era OS=Escherichia coli (strain B / BL21-DE3) OX=469008 GN=era PE=3 SV=1	21	6	6	6	301	33.8	7.25	15.12
A0A140N821	Fructose-bisphosphate aldolase OS=Escherichia coli (strain B / BL21-DE3) OX=469008 GN=ECBD_0813 PE=3 SV=1	14	3	4	3	359	39.1	5.86	14.91
A0A140NFN5	UDP-N-acetylmuramoyl-L-alanyl-D-glutamate--2,6-diaminopimelate ligase OS=Escherichia coli (strain B / BL21-DE3) OX=469008 GN=murE PE=3 SV=1	16	5	5	5	495	53.3	5.73	14.89
A0A140NGW9	Aspartate carbamoyltransferase OS=Escherichia coli (strain B / BL21-DE3) OX=469008 GN=pyrB PE=3 SV=1	22	4	4	4	311	34.4	6.61	14.6
A0A140NDJ4	Ribosomal protein S12 methylthiotransferase RimO OS=Escherichia coli (strain B / BL21-DE3) OX=469008 GN=rimO PE=3 SV=1	15	5	5	5	441	49.6	5.48	14.58
A0A140N4S8	Outer membrane protein assembly factor BamC OS=Escherichia coli (strain B / BL21-DE3) OX=469008 GN=bamC PE=3 SV=1	16	4	5	4	344	36.8	5.57	14.22
A0A140N692	DUF3053 domain-containing protein OS=Escherichia coli (strain B / BL21-DE3) OX=469008 GN=ECBD_0183 PE=4 SV=1	25	5	5	5	236	25.6	6.55	14.05
A0A140N7L9	30S ribosomal protein S11 OS=Escherichia coli (strain B / BL21-DE3) OX=469008 GN=rpsK PE=1 SV=1	43	4	4	4	129	13.8	11.33	14.04
A0A140SS47	Thiamine phosphate synthase OS=Escherichia coli (strain B / BL21-DE3) OX=469008 GN=ECBD_3976 PE=3 SV=1	54	4	4	4	138	15.6	7.02	13.77
A0A140NB46	Copper resistance protein C OS=Escherichia coli (strain B / BL21-DE3) OX=469008 GN=ECBD_1799 PE=3 SV=1	31	3	4	3	124	13.4	9.48	13.77
A0A140N6K1	Amino-acid acetyltransferase OS=Escherichia coli (strain B / BL21-DE3) OX=469008 GN=argA PE=3 SV=1	11	5	5	5	443	49.2	6.54	13.68
A0A140N7X0	Arabinose 5-phosphate isomerase OS=Escherichia coli (strain B / BL21-DE3) OX=469008 GN=ECBD_0545 PE=3 SV=1	18	5	5	5	328	35.2	6.71	13.65
A0A140NDZ4	DUF1722 domain-containing protein OS=Escherichia coli (strain B / BL21-DE3) OX=469008 GN=ECBD_2954 PE=4 SV=1	32	5	5	5	169	20.2	9.39	13.56
A0A140NFP9	Aconitate hydratase B OS=Escherichia coli (strain B / BL21-DE3) OX=469008 GN=ECBD_3501 PE=3 SV=1	8	5	5	5	865	93.4	5.4	13.54
A0A140NBG7	Fumarate hydratase class II OS=Escherichia coli (strain B / BL21-DE3) OX=469008 GN=fumC PE=3 SV=1	10	5	5	5	467	50.5	6.58	13.11
A0A140NDR8	Ubiquinone/menaquinone biosynthesis C-methyltransferase UbiE OS=Escherichia coli (strain B / BL21-DE3) OX=469008 GN=ubiE PE=3 SV=1	18	4	4	4	251	28.1	7.99	13.04
A0A140NEQ9	Two component transcriptional regulator, winged helix family OS=Escherichia coli (strain B / BL21-DE3) OX=469008 GN=ECBD_3918 PE=4 SV=1	34	4	4	4	222	25	6.01	12.96
A0A140N9E5	Glutamate--tRNA ligase OS=Escherichia coli (strain B / BL21-DE3) OX=469008 GN=gltX PE=3 SV=1	13	5	5	5	471	53.8	5.94	12.82
A0A140NDE6	Acetyl-coenzyme A carboxylase carboxyl transferase subunit alpha OS=Escherichia coli (strain B / BL21-DE3) OX=469008 GN=accA PE=3 SV=1	22	4	4	4	319	35.3	6.04	12.78
A0A140N6T7	50S ribosomal protein L19 OS=Escherichia coli (strain B / BL21-DE3) OX=469008 GN=rplS PE=1 SV=1	40	4	4	4	115	13.1	10.62	12.65
A0A140NDL0	Pyruvate dehydrogenase E1 component OS=Escherichia coli (strain B / BL21-DE3) OX=469008 GN=ECBD_3505 PE=4 SV=1	5	5	5	5	887	99.6	5.68	12.56
A0A140N4E6	DNA repair protein RecN OS=Escherichia coli (strain B / BL21-DE3) OX=469008 GN=ECBD_1071 PE=3 SV=1	11	5	5	5	553	61.4	5.53	12.36
A0A140NC81	Uncharacterized lipoprotein YdcL OS=Escherichia coli (strain B / BL21-DE3) OX=469008 GN=ECBD_2209 PE=4 SV=1	27	4	4	4	222	24.4	8.32	12.33
A0A140N3M3	Protease TldD OS=Escherichia coli (strain B / BL21-DE3) OX=469008 GN=ECBD_0502 PE=3 SV=1	16	3	3	3	481	51.3	5.06	12.28
A0A140N319	RNase adapter protein RapZ OS=Escherichia coli (strain B / BL21-DE3) OX=469008 GN=rapZ PE=3 SV=1	17	3	3	3	284	32.5	7.24	12.28
A0A140N2J1	33 kDa chaperonin OS=Escherichia coli (strain B / BL21-DE3) OX=469008 GN=hslO PE=3 SV=1	17	4	4	4	292	32.5	4.49	12.21
A0A140NCE7	DNA-directed RNA polymerase OS=Escherichia coli (strain B / BL21-DE3) OX=469008 GN=ECBD_2906 PE=3 SV=1	7	4	4	4	883	98.8	7.2	12.15
A0A140N8S5	Protein GrpE OS=Escherichia coli (strain B / BL21-DE3) OX=469008 GN=grpE PE=3 SV=1	28	3	3	3	197	21.8	4.75	12.05
A0A140NA84	Phosphate acetyltransferase OS=Escherichia coli (strain B / BL21-DE3) OX=469008 GN=ECBD_1362 PE=3 SV=1	6	4	4	4	714	77.1	5.41	11.94
A0A140N3G7	50S ribosomal protein L3 OS=Escherichia coli (strain B / BL21-DE3) OX=469008 GN=rplC PE=1 SV=1	21	4	4	4	209	22.2	9.91	11.83
A0A140NB96	Transcriptional regulator, LacI family OS=Escherichia coli (strain B / BL21-DE3) OX=469008 GN=ECBD_2908 PE=4 SV=1	12	4	4	4	363	38.9	6.89	11.82
A0A140NA86	Penicillin-binding protein activator LpoB OS=Escherichia coli (strain B / BL21-DE3) OX=469008 GN=lpoB PE=3 SV=1	23	3	3	3	213	22.5	6.93	11.81
A0A140N5Z1	Peptidase M23 OS=Escherichia coli (strain B / BL21-DE3) OX=469008 GN=ECBD_0982 PE=4 SV=1	15	4	4	4	379	40.1	9.51	11.46
A0A140NDL3	Outer membrane protein X OS=Escherichia coli (strain B / BL21-DE3) OX=469008 GN=ECBD_2809 PE=3 SV=1	38	4	4	4	171	18.6	7.17	11.45
A0A140N6V2	Diaminopimelate decarboxylase OS=Escherichia coli (strain B / BL21-DE3) OX=469008 GN=lysA PE=3 SV=1	14	3	3	3	420	46.1	6.04	11.42
A0A140NAR9	Holliday junction branch migration complex subunit RuvB OS=Escherichia coli (strain B / BL21-DE3) OX=469008 GN=ruvB PE=3 SV=1	16	4	4	4	336	37.2	5.16	11.32
A0A140NFF8	Molybdopterin-guanine dinucleotide biosynthesis protein B OS=Escherichia coli (strain B / BL21-DE3) OX=469008 GN=ECBD_4174 PE=4 SV=1	15	2	3	2	175	19.4	5.59	11.29
A0A140N6W9	Alanine--tRNA ligase OS=Escherichia coli (strain B / BL21-DE3) OX=469008 GN=alaS PE=3 SV=1	5	4	4	4	876	96	5.92	11.27
A0A140N870	Alcohol dehydrogenase GroES domain protein OS=Escherichia coli (strain B / BL21-DE3) OX=469008 GN=ECBD_1566 PE=3 SV=1	17	4	4	4	346	37.4	6.38	11.26
A0A140N783	Glyceraldehyde-3-phosphate dehydrogenase OS=Escherichia coli (strain B / BL21-DE3) OX=469008 GN=ECBD_1865 PE=3 SV=1	13	4	4	4	331	35.5	7.11	10.87
A0A140NCV3	PpiC-type peptidyl-prolyl cis-trans isomerase OS=Escherichia coli (strain B / BL21-DE3) OX=469008 GN=ECBD_3214 PE=4 SV=1	6	3	3	3	623	68.1	5.05	10.7
A0A140N2U1	Transcriptional regulator, AraC family OS=Escherichia coli (strain B / BL21-DE3) OX=469008 GN=ECBD_0165 PE=4 SV=1	14	4	4	4	392	44.8	6.6	10.63
A0A140N6C8	Membrane-bound lytic murein transglycosylase A OS=Escherichia coli (strain B / BL21-DE3) OX=469008 GN=ECBD_0909 PE=4 SV=1	11	3	3	3	365	40.4	9.03	10.59
A0A140N539	Dihydrofolate synthase/folylpolyglutamate synthase OS=Escherichia coli (strain B / BL21-DE3) OX=469008 GN=ECBD_1344 PE=3 SV=1	14	4	4	4	422	45.4	5.8	10.52
A0A140N5D7	50S ribosomal protein L21 OS=Escherichia coli (strain B / BL21-DE3) OX=469008 GN=rplU PE=1 SV=1	36	4	4	4	103	11.6	9.85	10.48
A0A140NHL8	Transcription termination/antitermination protein NusG OS=Escherichia coli (strain B / BL21-DE3) OX=469008 GN=nusG PE=3 SV=1	20	3	4	3	181	20.5	6.81	10.26
A0A140N8J0	PTS system, fructose subfamily, IIC subunit OS=Escherichia coli (strain B / BL21-DE3) OX=469008 GN=ECBD_1491 PE=4 SV=1	12	4	4	4	563	57.5	8.75	10.25
A0A140NAT7	ABC transporter related OS=Escherichia coli (strain B / BL21-DE3) OX=469008 GN=ECBD_1780 PE=4 SV=1	16	3	3	3	251	27.9	9.33	10.24
A0A140N7T7	DegT/DnrJ/EryC1/StrS aminotransferase OS=Escherichia coli (strain B / BL21-DE3) OX=469008 GN=ECBD_1619 PE=3 SV=1	13	3	3	3	370	41.3	6.95	10.22
A0A140N4H3	30S ribosomal protein S12 OS=Escherichia coli (strain B / BL21-DE3) OX=469008 GN=rpsL PE=1 SV=1	18	3	4	3	124	13.7	10.87	10.21
A0A140N4T4	Glutamate synthase, small subunit OS=Escherichia coli (strain B / BL21-DE3) OX=469008 GN=ECBD_1222 PE=4 SV=1	9	4	4	3	659	71.8	6.79	10.21
A0A140N9P4	Dual-specificity RNA methyltransferase RlmN OS=Escherichia coli (strain B / BL21-DE3) OX=469008 GN=rlmN PE=3 SV=1	10	4	4	4	384	43.1	6.99	10.05
A0A140NCM4	Fatty acid metabolism regulator protein OS=Escherichia coli (strain B / BL21-DE3) OX=469008 GN=fadR PE=3 SV=1	13	3	4	3	239	27	7.02	10.03
A0A140N599	DNA topoisomerase 4 subunit B OS=Escherichia coli (strain B / BL21-DE3) OX=469008 GN=parE PE=3 SV=1	8	3	3	3	630	70.2	5.66	9.72
A0A140N2D9	Chromosomal replication initiator protein DnaA OS=Escherichia coli (strain B / BL21-DE3) OX=469008 GN=dnaA PE=3 SV=1	12	3	3	3	467	52.5	8.66	9.66
A0A140NAQ0	Iron-sulfur cluster carrier protein OS=Escherichia coli (strain B / BL21-DE3) OX=469008 GN=ECBD_1545 PE=3 SV=1	14	3	3	3	369	39.9	6.3	9.47
A0A140N6U4	Hydrogenase accessory protein HypB OS=Escherichia coli (strain B / BL21-DE3) OX=469008 GN=ECBD_0998 PE=3 SV=1	13	3	3	3	290	31.5	5.66	9.44
A0A140NEF9	Pantothenate kinase OS=Escherichia coli (strain B / BL21-DE3) OX=469008 GN=coaA PE=3 SV=1	13	3	3	3	316	36.3	6.81	9.36
A0A140N6I5	Selenide, water dikinase OS=Escherichia coli (strain B / BL21-DE3) OX=469008 GN=selD PE=3 SV=1	10	3	3	3	347	36.7	5.43	9.34
A0A140N6A8	Type I secretion outer membrane protein, TolC family OS=Escherichia coli (strain B / BL21-DE3) OX=469008 GN=ECBD_0704 PE=3 SV=1	11	3	3	3	493	53.7	5.66	9.27
A0A140NEQ0	ATP-dependent Clp protease ATP-binding subunit ClpX OS=Escherichia coli (strain B / BL21-DE3) OX=469008 GN=clpX PE=3 SV=1	9	3	3	3	424	46.3	5.35	8.93
A0A140N3Q3	L-lactate dehydrogenase OS=Escherichia coli (strain B / BL21-DE3) OX=469008 GN=lldD PE=3 SV=1	10	3	3	3	396	42.7	6.81	8.68
A0A140N3P4	Glycosyl transferase family 2 OS=Escherichia coli (strain B / BL21-DE3) OX=469008 GN=ECBD_0110 PE=4 SV=1	10	3	3	3	344	40.5	9.31	8.66
A0A140NA72	Peptidase U32 OS=Escherichia coli (strain B / BL21-DE3) OX=469008 GN=ECBD_1572 PE=4 SV=1	8	3	3	3	453	51.1	6.19	8.59
A0A140N560	NADH-quinone oxidoreductase subunit B OS=Escherichia coli (strain B / BL21-DE3) OX=469008 GN=nuoB PE=3 SV=1	16	3	3	3	220	25	5.74	8.51
A0A140N793	Chaperone protein HscA OS=Escherichia coli (strain B / BL21-DE3) OX=469008 GN=hscA PE=3 SV=1	6	3	3	3	616	65.6	5.2	8.44
A0A140N729	Inner membrane lipoprotein DcrB OS=Escherichia coli (strain B / BL21-DE3) OX=469008 GN=dcrB PE=3 SV=1	16	2	2	2	185	19.8	5.33	8.42
A0A140NG76	UDP-N-acetylmuramate--L-alanine ligase OS=Escherichia coli (strain B / BL21-DE3) OX=469008 GN=murC PE=3 SV=1	6	3	3	3	491	53.6	5.76	8.27
A0A140NFC7	3-hydroxyacyl-[acyl-carrier-protein] dehydratase FabZ OS=Escherichia coli (strain B / BL21-DE3) OX=469008 GN=fabZ PE=3 SV=1	16	2	3	2	151	17	7.39	8.27
A0A140N6A5	Chaperone protein ClpB OS=Escherichia coli (strain B / BL21-DE3) OX=469008 GN=clpB PE=3 SV=1	6	3	3	3	857	95.5	5.52	8.24
A0A140N5W3	Aminotransferase class I and II OS=Escherichia coli (strain B / BL21-DE3) OX=469008 GN=ECBD_1369 PE=4 SV=1	10	3	3	3	405	45.5	6.25	8.23
A0A140N490	Glycogen synthase OS=Escherichia coli (strain B / BL21-DE3) OX=469008 GN=glgA PE=3 SV=1	9	3	3	3	477	52.8	6.62	8.16
A0A140N8Y0	Fumarate hydratase class I OS=Escherichia coli (strain B / BL21-DE3) OX=469008 GN=ECBD_2034 PE=3 SV=1	12	3	3	3	548	60.3	6.55	8.13
A0A140N997	asparaginase OS=Escherichia coli (strain B / BL21-DE3) OX=469008 GN=ECBD_1877 PE=3 SV=1	14	3	3	3	338	37.1	5.86	8.02
A0A140NFW2	UPF0294 protein YafD OS=Escherichia coli (strain B / BL21-DE3) OX=469008 GN=yafD PE=3 SV=1	15	3	3	3	259	29.1	9.41	8
A0A140N7P0	Exodeoxyribonuclease 7 large subunit OS=Escherichia coli (strain B / BL21-DE3) OX=469008 GN=xseA PE=3 SV=1	7	3	3	3	456	51.8	9.98	7.87
A0A140NFB9	Formate dehydrogenase, alpha subunit OS=Escherichia coli (strain B / BL21-DE3) OX=469008 GN=ECBD_4131 PE=3 SV=1	3	2	2	2	1016	112.5	7.28	7.86
A0A140N4P3	4-hydroxy-3-methylbut-2-en-1-yl diphosphate synthase (flavodoxin) OS=Escherichia coli (strain B / BL21-DE3) OX=469008 GN=ispG PE=3 SV=1	13	3	3	3	372	40.7	6.21	7.83
A0A140NFK2	30S ribosomal protein S2 OS=Escherichia coli (strain B / BL21-DE3) OX=469008 GN=rpsB PE=1 SV=1	16	3	3	3	241	26.7	7.14	7.82
A0A140NGG2	Peptidyl-prolyl cis-trans isomerase OS=Escherichia coli (strain B / BL21-DE3) OX=469008 GN=ECBD_3822 PE=3 SV=1	18	3	3	3	206	22.2	4.96	7.81
A0A140NGH2	Energy-dependent translational throttle protein EttA OS=Escherichia coli (strain B / BL21-DE3) OX=469008 GN=ettA PE=3 SV=1	5	3	3	3	555	62.4	5.6	7.72
A0A140NGG7	30S ribosomal protein S6 OS=Escherichia coli (strain B / BL21-DE3) OX=469008 GN=rpsF PE=1 SV=1	15	2	3	2	131	15.2	5.39	7.7
A0A140N7T5	Lipopolysaccharide kinase OS=Escherichia coli (strain B / BL21-DE3) OX=469008 GN=ECBD_1423 PE=4 SV=1	13	2	2	2	216	25.3	9.04	7.61
A0A140N9F0	Adenosine deaminase OS=Escherichia coli (strain B / BL21-DE3) OX=469008 GN=add PE=3 SV=1	13	3	3	3	333	36.4	5.6	7.49
A0A140NC90	Putative gluconeogenesis factor OS=Escherichia coli (strain B / BL21-DE3) OX=469008 GN=ECBD_2843 PE=3 SV=1	13	3	3	3	302	32.8	6.46	7.47
A0A140NCZ5	Sec translocon accessory complex subunit YajC OS=Escherichia coli (strain B / BL21-DE3) OX=469008 GN=ECBD_3254 PE=3 SV=1	20	2	3	2	110	11.9	9.58	7.36
A0A140ND17	Protein translocase subunit SecA OS=Escherichia coli (strain B / BL21-DE3) OX=469008 GN=secA PE=2 SV=1	3	2	2	2	901	102	5.6	7.34
A0A140NEB2	4-hydroxy-tetrahydrodipicolinate reductase OS=Escherichia coli (strain B / BL21-DE3) OX=469008 GN=dapB PE=3 SV=1	12	3	3	3	273	28.7	5.76	7.21
A0A140SSB1	Ribosomal RNA small subunit methyltransferase G OS=Escherichia coli (strain B / BL21-DE3) OX=469008 GN=rsmG PE=3 SV=1	15	3	3	3	207	23.4	6.54	7.2
A0A140N7K8	30S ribosomal protein S14 OS=Escherichia coli (strain B / BL21-DE3) OX=469008 GN=rpsN PE=1 SV=1	29	2	2	2	101	11.6	11.17	7.11
A0A140N8X9	Serine hydroxymethyltransferase OS=Escherichia coli (strain B / BL21-DE3) OX=469008 GN=glyA PE=3 SV=1	6	3	3	3	417	45.3	6.48	7.1
A0A140NAF7	Formyltetrahydrofolate deformylase OS=Escherichia coli (strain B / BL21-DE3) OX=469008 GN=purU PE=3 SV=1	11	2	2	2	280	31.9	7.01	7.05
C5W865	Sulfite reductase [NADPH] hemoprotein beta-component OS=Escherichia coli (strain B / BL21-DE3) OX=469008 GN=cysI PE=3 SV=1	4	2	2	2	570	63.9	7.62	6.92
A0A140N6E5	D-tagatose-1,6-bisphosphate aldolase subunit GatZ OS=Escherichia coli (strain B / BL21-DE3) OX=469008 GN=gatZ PE=3 SV=1	12	2	3	2	420	47	5.78	6.91
A0A140NDD7	Sulfatase OS=Escherichia coli (strain B / BL21-DE3) OX=469008 GN=ECBD_4069 PE=4 SV=1	11	2	2	2	577	66.5	7.15	6.88
A0A140N7Q6	DNA-binding protein Fis OS=Escherichia coli (strain B / BL21-DE3) OX=469008 GN=fis PE=3 SV=1	33	2	2	2	98	11.2	9.35	6.83
A0A140N5K8	50S ribosomal protein L4 OS=Escherichia coli (strain B / BL21-DE3) OX=469008 GN=rplD PE=1 SV=1	14	3	3	3	201	22.1	9.73	6.82
A0A140NAN3	Isocitrate dehydrogenase [NADP] OS=Escherichia coli (strain B / BL21-DE3) OX=469008 GN=ECBD_2463 PE=4 SV=1	9	3	3	3	416	45.7	5.4	6.76
A0A140SS26	DNA mismatch repair protein MutL OS=Escherichia coli (strain B / BL21-DE3) OX=469008 GN=mutL PE=3 SV=1	6	2	2	2	615	67.9	6.77	6.63
A0A140N5A9	Fe/S biogenesis protein NfuA OS=Escherichia coli (strain B / BL21-DE3) OX=469008 GN=nfuA PE=3 SV=1	12	2	2	2	191	21	4.64	6.63
A0A140NDB2	DUF535 domain-containing protein OS=Escherichia coli (strain B / BL21-DE3) OX=469008 GN=ECBD_2717 PE=4 SV=1	8	2	2	2	330	38.3	9.42	6.6
A0A140N9H4	1,4-dihydroxy-2-naphthoyl-CoA hydrolase OS=Escherichia coli (strain B / BL21-DE3) OX=469008 GN=menI PE=3 SV=1	22	2	2	2	136	14.9	7.43	6.59
A0A140N6A0	OmpA/MotB domain protein OS=Escherichia coli (strain B / BL21-DE3) OX=469008 GN=ECBD_0185 PE=4 SV=1	17	2	2	2	219	22.2	9.8	6.55
A0A140NHQ8	ATP-dependent protease subunit HslV OS=Escherichia coli (strain B / BL21-DE3) OX=469008 GN=hslV PE=2 SV=1	13	2	2	2	176	19.1	6.39	6.4
A0A140NF32	50S ribosomal protein L11 OS=Escherichia coli (strain B / BL21-DE3) OX=469008 GN=rplK PE=3 SV=1	17	2	2	2	142	14.9	9.63	6.36
A0A140N8W1	Signal peptidase I OS=Escherichia coli (strain B / BL21-DE3) OX=469008 GN=ECBD_1113 PE=3 SV=1	11	3	3	3	324	35.9	7.33	6.33
A0A140SS69	Iron-containing alcohol dehydrogenase OS=Escherichia coli (strain B / BL21-DE3) OX=469008 GN=ECBD_4078 PE=3 SV=1	7	2	2	2	367	38.7	4.88	6.33
A0A140NFB2	GCN5-related N-acetyltransferase OS=Escherichia coli (strain B / BL21-DE3) OX=469008 GN=ECBD_3937 PE=4 SV=1	16	2	2	2	144	16.6	6.52	6.3
A0A140NCU2	Acyl-[acyl-carrier-protein]--UDP-N-acetylglucosamine O-acyltransferase OS=Escherichia coli (strain B / BL21-DE3) OX=469008 GN=lpxA PE=3 SV=1	11	3	3	3	262	28.1	7.12	6.25
A0A140N7Q1	Uridine kinase OS=Escherichia coli (strain B / BL21-DE3) OX=469008 GN=udk PE=3 SV=1	12	2	2	2	213	24.3	6.87	6.25
A0A140NEX9	Replicative DNA helicase OS=Escherichia coli (strain B / BL21-DE3) OX=469008 GN=ECBD_3981 PE=3 SV=1	7	2	2	2	471	52.4	5.06	6.22
A0A140N8H0	Sulfate adenylyltransferase subunit 1 OS=Escherichia coli (strain B / BL21-DE3) OX=469008 GN=cysN PE=3 SV=1	6	2	2	2	475	52.5	5.22	6.21
A0A140NAZ3	serine-type D-Ala-D-Ala carboxypeptidase OS=Escherichia coli (strain B / BL21-DE3) OX=469008 GN=ECBD_1647 PE=3 SV=1	9	2	2	2	388	43.3	7.12	6.18
A0A140N9R6	Exoribonuclease 2 OS=Escherichia coli (strain B / BL21-DE3) OX=469008 GN=rnb PE=3 SV=1	5	2	2	2	644	72.4	5.67	6.08
A0A140NDM3	UDP-N-acetylglucosamine--N-acetylmuramyl-(pentapeptide) pyrophosphoryl-undecaprenol N-acetylglucosamine transferase OS=Escherichia coli (strain B / BL21-DE3) OX=469008 GN=murG PE=3 SV=1	8	2	2	2	355	37.8	9.73	6.05
A0A140ND09	Histidine triad (HIT) protein OS=Escherichia coli (strain B / BL21-DE3) OX=469008 GN=ECBD_2498 PE=4 SV=1	18	2	2	2	119	13.2	6.18	5.98
A0A140NBZ3	Protein HflK OS=Escherichia coli (strain B / BL21-DE3) OX=469008 GN=ECBD_3860 PE=3 SV=1	8	2	2	2	419	45.5	6.43	5.88
A0A140NFZ3	Patatin OS=Escherichia coli (strain B / BL21-DE3) OX=469008 GN=ECBD_3643 PE=4 SV=1	8	2	2	2	357	39.8	8.48	5.87
A0A140NB12	YodA domain protein OS=Escherichia coli (strain B / BL21-DE3) OX=469008 GN=ECBD_1672 PE=4 SV=1	12	2	2	2	216	24.8	6.37	5.8
A0A140N7V1	4Fe-4S ferredoxin iron-sulfur binding domain protein OS=Escherichia coli (strain B / BL21-DE3) OX=469008 GN=ECBD_0742 PE=4 SV=1	6	2	2	2	328	36	7.36	5.79
A0A140NAX3	FAD-dependent pyridine nucleotide-disulphide oxidoreductase OS=Escherichia coli (strain B / BL21-DE3) OX=469008 GN=ECBD_2492 PE=4 SV=1	7	2	2	2	434	47.3	8.85	5.7
A0A140NA76	Resolvase domain protein OS=Escherichia coli (strain B / BL21-DE3) OX=469008 GN=ECBD_2094 PE=3 SV=1	12	2	2	2	196	21.9	9.8	5.46
A0A140NAU8	Ribosomal-protein-alanine N-acetyltransferase OS=Escherichia coli (strain B / BL21-DE3) OX=469008 GN=ECBD_2534 PE=4 SV=1	10	2	2	2	194	22.7	9.14	5.42
A0A140N9G6	Outer membrane protein assembly factor BamD OS=Escherichia coli (strain B / BL21-DE3) OX=469008 GN=bamD PE=3 SV=1	11	2	2	2	245	27.8	6.6	5.38
A0A140NEV3	1-deoxy-D-xylulose-5-phosphate synthase OS=Escherichia coli (strain B / BL21-DE3) OX=469008 GN=dxs PE=3 SV=1	4	2	2	2	620	67.6	6.62	5.37
A0A140SSB0	Uridine phosphorylase OS=Escherichia coli (strain B / BL21-DE3) OX=469008 GN=ECBD_4198 PE=3 SV=1	8	2	2	2	254	27.3	6.43	5.3
A0A140NBG0	Putative enzyme OS=Escherichia coli (strain B / BL21-DE3) OX=469008 GN=ECBD_1834 PE=4 SV=1	3	2	2	2	636	70.3	7.08	5.13
A0A140N7V2	ATP phosphoribosyltransferase OS=Escherichia coli (strain B / BL21-DE3) OX=469008 GN=hisG PE=3 SV=1	7	2	2	2	299	33.3	6.01	5.08
A0A140NFD7	Elongation factor Ts OS=Escherichia coli (strain B / BL21-DE3) OX=469008 GN=tsf PE=3 SV=1	6	2	2	2	283	30.4	5.29	4.96
A0A140N751	Uracil phosphoribosyltransferase OS=Escherichia coli (strain B / BL21-DE3) OX=469008 GN=upp PE=3 SV=1	12	2	2	2	208	22.5	5.47	4.94
A0A140N679	Phosphofructokinase OS=Escherichia coli (strain B / BL21-DE3) OX=469008 GN=ECBD_1490 PE=3 SV=1	6	2	2	2	312	33.7	5.54	4.93
A0A140N624	GntR domain protein OS=Escherichia coli (strain B / BL21-DE3) OX=469008 GN=ECBD_0121 PE=4 SV=1	8	2	2	2	258	29.1	6.92	4.89
A0A140NFS1	DNA-binding transcriptional activator CaiF OS=Escherichia coli (strain B / BL21-DE3) OX=469008 GN=ECBD_3581 PE=4 SV=1	17	2	2	2	131	15.4	8.72	4.85
A0A140NAT1	Lipid-A-disaccharide synthase OS=Escherichia coli (strain B / BL21-DE3) OX=469008 GN=lpxB PE=3 SV=1	6	2	2	2	382	42.4	7.03	4.82
A0A140N3I1	Protein translocase subunit SecY OS=Escherichia coli (strain B / BL21-DE3) OX=469008 GN=secY PE=3 SV=1	6	2	2	2	443	48.5	9.89	4.79
A0A140N753	Alpha-1,4 glucan phosphorylase OS=Escherichia coli (strain B / BL21-DE3) OX=469008 GN=ECBD_0328 PE=3 SV=1	4	2	2	2	797	90.5	7.39	4.79
A0A140N7R5	Probable 4-deoxy-4-formamido-L-arabinose-phosphoundecaprenol deformylase ArnD OS=Escherichia coli (strain B / BL21-DE3) OX=469008 GN=arnD PE=3 SV=1	5	2	2	2	296	33.1	7.58	4.75
A0A140ND85	Phosphate-specific transport system accessory protein PhoU OS=Escherichia coli (strain B / BL21-DE3) OX=469008 GN=ECBD_4308 PE=3 SV=1	8	2	2	2	241	27.4	5.31	4.66
A0A140NCH2	Oligopeptide/dipeptide ABC transporter, ATPase subunit OS=Escherichia coli (strain B / BL21-DE3) OX=469008 GN=ECBD_2375 PE=4 SV=1	6	2	2	2	334	37.2	7.75	4.62
A0A140N996	Aspartate--tRNA ligase OS=Escherichia coli (strain B / BL21-DE3) OX=469008 GN=aspS PE=3 SV=1	4	2	2	2	590	65.9	5.69	4.62
A0A140NA59	Insertion element protein OS=Escherichia coli (strain B / BL21-DE3) OX=469008 GN=ECBD_0099 PE=3 SV=1	33	2	2	2	91	9.9	10.29	4.6
A0A140N811	30S ribosomal protein S15 OS=Escherichia coli (strain B / BL21-DE3) OX=469008 GN=rpsO PE=1 SV=1	19	2	2	2	89	10.3	10.4	4.57
A0A140NCU5	6,7-dimethyl-8-ribityllumazine synthase OS=Escherichia coli (strain B / BL21-DE3) OX=469008 GN=ribH PE=3 SV=1	13	2	2	2	156	16.1	5.25	4.57
A0A140NAN4	Lipopolysaccharide biosynthesis protein OS=Escherichia coli (strain B / BL21-DE3) OX=469008 GN=ECBD_1632 PE=4 SV=1	6	2	2	2	326	36.3	5.34	4.55
A0A140NEC6	Aspartate carbamoyltransferase regulatory chain OS=Escherichia coli (strain B / BL21-DE3) OX=469008 GN=pyrI PE=3 SV=1	14	2	2	2	153	17.1	7.37	4.51
A0A140NFV1	Phosphate ABC transporter, ATPase subunit OS=Escherichia coli (strain B / BL21-DE3) OX=469008 GN=ECBD_4307 PE=4 SV=1	9	2	2	2	257	29	6.55	4.39
A0A140NDL8	Thioesterase domain protein OS=Escherichia coli (strain B / BL21-DE3) OX=469008 GN=ECBD_4139 PE=4 SV=1	6	2	2	2	313	35.3	6.35	4.27
A0A140NEF6	Inorganic pyrophosphatase OS=Escherichia coli (strain B / BL21-DE3) OX=469008 GN=ppa PE=3 SV=1	11	2	2	2	176	19.7	5.17	4.25
A0A140N8V2	Septum site-determining protein MinD OS=Escherichia coli (strain B / BL21-DE3) OX=469008 GN=ECBD_2447 PE=3 SV=1	8	2	2	2	270	29.6	5.38	3.85
